# Supplementary material
Source: publisher site journal article supplement (https://www.dovepress.com/article/282965)
Supplement: Supplementary file 1 [file get_supplementary_file.php]

**Supplementary file**

**Table S1: Distribution of ‘flood effects’ components across study sites**

| **Variables** | **Total (n; %)** | | | **Manikganj (n; %)** | | | **Kurigram (n; %)** | | |
| --- | --- | --- | --- | --- | --- | --- | --- | --- | --- |
|  | **Yes (%)** | ***χ2* test value (df)** | ***p*-value** | **Yes (%)** | ***χ2* test value (df)** | ***p*-value** | **Yes (%)** | ***χ2* test value (df)** | ***p*-value** |
| **Became unemployed** | | | | | | | | | |
| No (0) | 41 (50.6%) | 2.132 (1) | 0.144 | 17 (30.9%) | 0.208 (1) | 0.648 | 24 (92.3%) | 1.364 (1) | 0.243 |
| Yes (1) | 159 (59.8%) | 44 (34.4%) | 115 (83.3%) |
| **Physical injured due to flood** | | | | | | | | | |
| No (0) | 110 (50.5%) | 12.280 (1) | <0.001 | 42 (31.6%) | 0.832 (1) | 0.362 | 68 (80%) | 2.859 (1) | 0.091 |
| Yes (1) | 88 (69.8%) | 19 (38.8%) | 69 (89.6%) |
| **Having diseases e.g., diarrhea, dysentery, jaundice etc.) due to flood** | | | | | | | | | |
| No (0) | 60 (42.3%) | 23.531 (1) | <0.001 | 31 (29.2%) | 1.759 (1) | 0.185 | 29 (80.6%) | 0.630 (1) | 0.427 |
| Yes (1) | 139 (68.5%) | 29 (38.7%) | 110 (85.9%) |
| **Death of any family members** | | | | | | | | | |
| No (0) | 171 (55%) | 8.057 (1) | 0.005 | 58 (32.8%) | 0.775 (1) | 0.379 | 113 (84.3%) | 0.065 (1) | 0.799 |
| Yes (1) | 28 (80%) | 3 (50%) | 25 (86.2%) |
| **Death of domestic animal** | | | | | | | | | |
| No (0) | 79 (44.9%) | 23.377 (1) | <0.001 | 48 (34.3%) | 0.477 (1) | 0.490 | 31 (86.1%) | 0.066 (1) | 0.798 |
| Yes (1) | 120 (70.6%) | 12 (28.6) | 108 (84.4%) |
| **Crops damages** | | | | | | | | | |
| No (0) | 44 (46.8%) | 6.191 (1) | 0.013 | 20 (29.9%) | 0.577 (1) | 0.448 | 24 (88.9%) | 0.427 (1) | 0.513 |
| Yes (1) | 156 (61.7%) | 41 (35.3%) | 115 (83.9%) |
| **House damages** | | | | | | | | | |
| No (0) | 35 (38.5%) | 18.112 (1) | <0.001 | 18 (24.7%) | 4.114 (1) | 0.043 | 17 (94.4%) | 1.514 (1) | 0.219 |
| Yes (1) | 163 (64.2%) | 43 (39.1%) | 120 (83.3%) |
| **Did not get any relief fund after flood** | | | | | | | | | |
| No (0) | 40 (51.3%) | 1.538 (1) | 0.215 | 12 (24.5%) | 2.181 (1) | 0.140 | 28 (96.6%) | 3.840 (1) | 0.050 |
| Yes (1) | 158 (59.2%) | 48 (36.1%) | 110 (82.1%) |
| **Economic loss due to flood (BDT)** | | | | | | | | | |
| High (2) | 8 (33.3%) | 6.833 (2) | 0.033 | 7 (33.3%) | 0.396 (2) | 0.821 | 1 (33.3%) | 10.775 (2) | 0.005 |
| Moderate (1) | 36 (60%) | 10 (40%) | 26 (74.3%) |
| Low (0) | 156 (60.7%) | 44 (33.6%) | 112 (88.9%) |
| **Went to the Shelter** | | | | | | | | | |
| No (0) | 136 (52.7%) | 7.653 (1) | 0.006 | 41 (28.9%) | 5.140 (1) | 0.023 | 95 (81.9%) | 1.965 (1) | 0.161 |
| Yes (1) | 60 (69.8%) | 20 (47.6%) | 40 (90.9%) |

Effects of flood was calculated based on provided coding in the Table, whereas 0 to 12 was the possible score range. Based on the previous study 21, having affected with any of two general components were considered for ‘lower effect’ (0 to 2 score), whereas a score between 3 to 5 were donated ‘moderate effect’ and equal or more than 6 was for ‘severe effect’.
